# Supplementary material
Source: Springer Nature journal article supplement (https://www.springermedizin.de/resource/supplementary/12936_2012_2196_MOESM1_ESM.pdf/9542486)

## A) Hormozgan

## B) Kerman

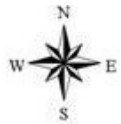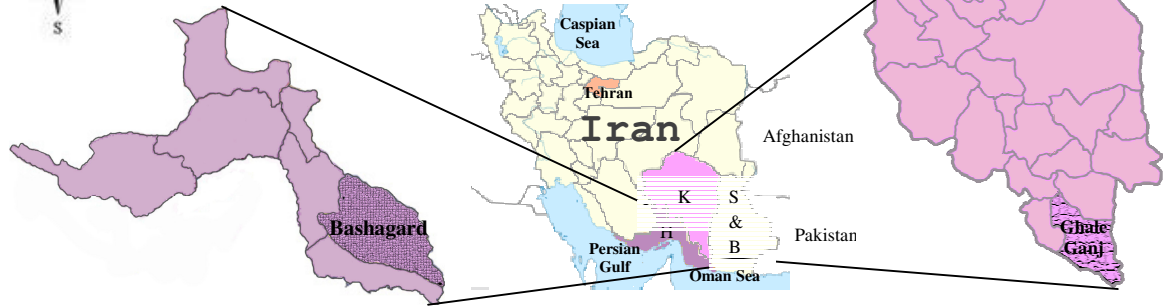

Supplement: MOESM1 [file 9542486]
